# Supplementary material for: Effective passivation of a high-voltage positive electrode by 5-hydroxy-1H-indazole additives
Source: Royal Society of Chemistry journal article supplement (doi:10.1039/c4ta01891e), 2014-01-01
Supplement: c4ta01891e1.pdf [file c4ta01891e1.pdf]

## SUPPLEMENTARY DATA

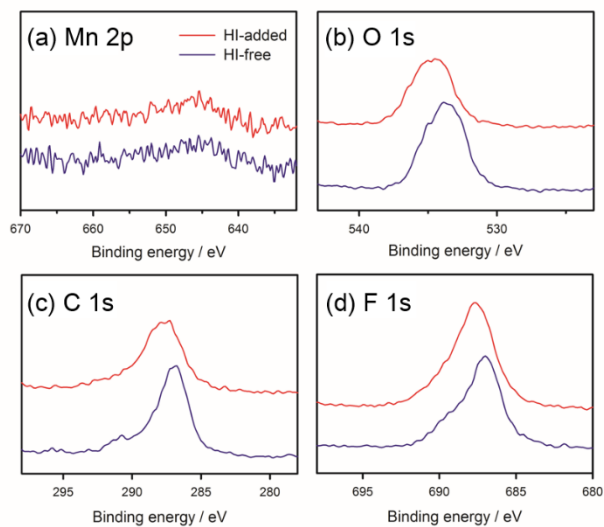

S. 1. The XPS spectra obtained from the graphite electrodes that were cycled in HI-free and HI-added electrolyte: (a) Mn 2p, (b) O 1s, (c) C 1s and (d) F 1s
